# Supplementary material for: Arsenite-induced apoptosis can be attenuatedviadepletion of mTOR activity to restore autophagy
Source: Royal Society of Chemistry journal article supplement (doi:10.1039/c8tx00238j), 2018-10-30
Supplement: c8tx00238j1.pdf [file c8tx00238j1.pdf]

## Supplemental results

Figure S1. The proportion of apoptotic cells after NaAsO<sub>2</sub> treatment. HEK293 cells were treated with various concentrations of NaAsO<sub>2</sub> for 24 h and stained with propidium iodide. Sub-G1 fractions of the cells were determined by flow cytometry (Lin, et al., J. Cell. Physiol. 205:428-436, 2005). Each value represents a mean ± standard deviation of three independent samples. Asterisks indicate significant differences as compared to that of untreated samples. \*:  $p < 0.05$ .

Figure S2. Effect of various inhibitors on the lysosomal activity of arsenite-treated cells. HEK293 cells were treated with 20 μM NaAsO<sub>2</sub> for 24 h in the presence of (A) ERK (PD98059, 20 μM), JNK (SP600125, 15 μM) or p38 (SB202190, 10 μM) inhibitor and (B) apoptosis inhibitor (z-VAD-FMK, 20 μM). Lysosomal (acid phosphatase) activities were determined. Each value represents a mean ± standard deviation of three independent samples.

Figure S3. PTEN is not degraded through proteasome in arsenite-treated. Cells were treated with 20 μM NaAsO<sub>2</sub> for 24 h in the presence or absence of 20 μM MG132. PTEN levels in SF and InF were analyzed by immunoblotting. GAPDH and Lamin B1 were used as a loading control for SF and InF, respectively.

Figure S4. Effect of apoptosis inhibitor on factors altered by arsenite treatment. HEK293 cells were treated with 20 μM NaAsO<sub>2</sub> for 24 h in the presence of apoptosis inhibitor (z-VAD-fmk, 20 μM). Cells were harvested and mTOR, LC3 and p62 were visualized by immunoblotting. The phosphorylated mTOR level was indicated as pmTOR.

Figure S5. Effect of JNK inhibitor on the viability of arsenite treated cells. HEK293 cells were treated with 20  $\mu\text{M}$  NaAsO<sub>2</sub> for 24 h in the presence of JNK inhibitor (SP600125, 15  $\mu\text{M}$ ). Cell viability was determined by the MTT assay. Each value represents a mean  $\pm$  standard deviation of three independent samples. Asterisk indicates significant differences as compared to that of untreated samples. \*:  $p < 0.05$ .

Figure S6. Effect of ERK inhibitor on the viability of arsenite-treated cells. HEK293 cells were treated with 20  $\mu\text{M}$  NaAsO<sub>2</sub> for 24 h in the presence of ERK inhibitor (PD98059, 20  $\mu\text{M}$ ) with and without rapamycin (100 nM). Cell viability was determined by the MTT assay. Each value represents a mean  $\pm$  standard deviation of three independent samples. Asterisks indicate significant differences as compared to that of untreated samples. \*:  $p < 0.05$ .

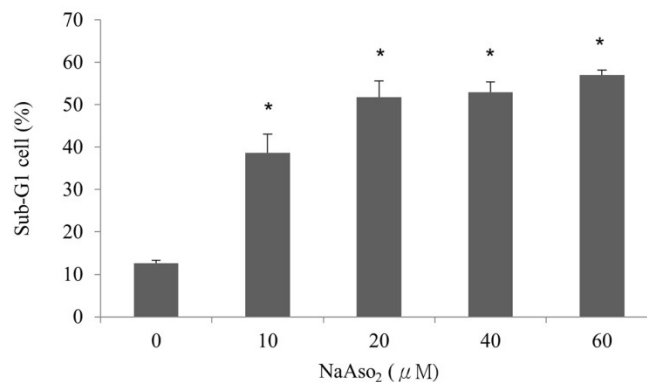

FIG. S1

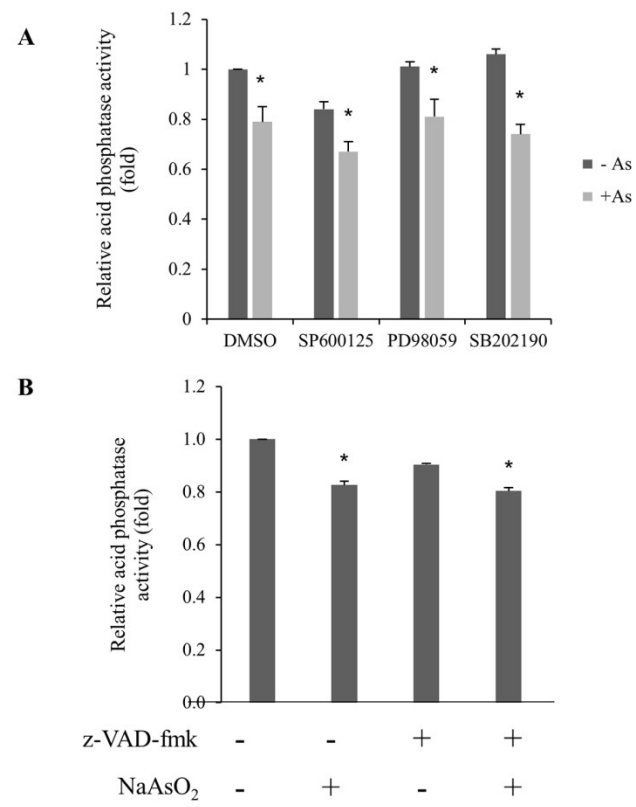

FIG. S2

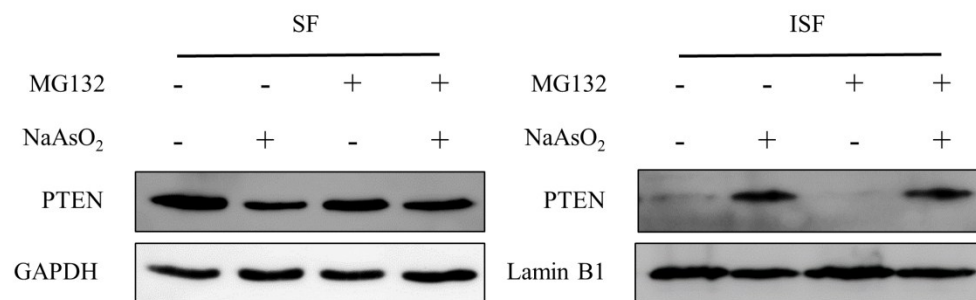

FIG. S3

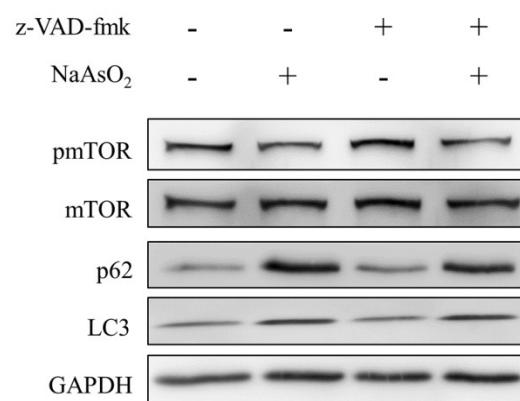

FIG. S4

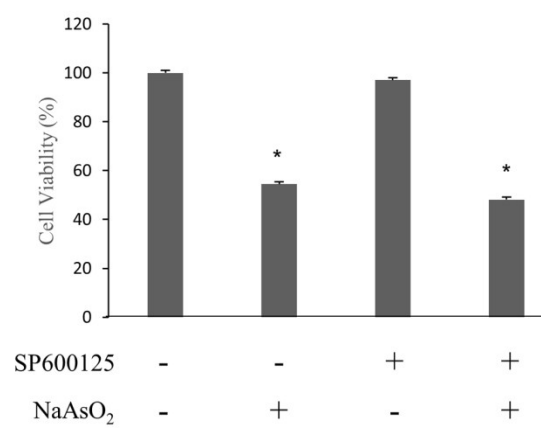

FIG. S5

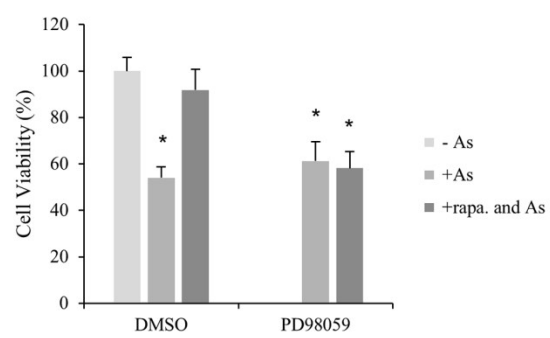

FIG. S6
